# Supplementary material
Source: PubMed Central journal article supplement (PMC4089451)
Supplement: JCI73408sd.pdf [file JCI73408sd.pdf]

## **Supplementary Figure Legends**

### **S1. S1PR2-deficient mice on a 129S/B6 background do not exhibit sexually**

**dimorphism in BBB permeability.** **A.** Western blot analysis of S1PR<sub>2</sub> in brain extracts from wild-type (WT) and S1PR<sub>2</sub><sup>-/-</sup> mice. **B.** Male (light and dark blue bars) and female (pink and red bars) S1PR<sub>2</sub><sup>-/-</sup> mice were examined for BBB NaFluorescein permeability within CTX, CB, and SC, normalized to serum values for individual mice (5-8 mice per group). Data are reported as arbitrary fluorescence values, normalized to mean  $\pm$  S.E.M. values for naïve male C57BL/6 in each CNS region.

### **S2. Sexually dimorphic expression of S1PR2 in SJL cerebella is not controlled by**

**the Y chromosome.** Protein lysates derived from CNS regions of naïve male and female SJL and male SJL carrying a B10.S Y chromosome (SJL.Y<sup>B10.S</sup>) were probed for S1PR2 (red), with  $\beta$ -Tubulin (green) probed as a loading control. Data are reported as density values of S1PR2 normalized to density values for  $\beta$ -Tubulin. Group data are normalized to mean values for normal male SJL mice in each CNS region. Data are mean values of 3-4 mice per group. Error bars represent  $\pm$  1 SEM. All data were analyzed via 1-way ANOVA. \*p<0.05.

### **S3. Sex and strain differences in BBB permeability are not due to dimorphic**

**expression of Claudin-5.** Protein lysates derived from CNS regions of naïve male and female C57/Bl6 and SJL mice were probed for S1PR2 (red), with  $\beta$ -Tubulin (green) probed as a loading control. Data are reported as density values of Claudin-5 normalized to density values for  $\beta$ -Tubulin. Group data are normalized to mean values for male C57/Bl6 mice in each CNS region. Data are mean values of 3 mice per group. Error bars represent  $\pm$  1 SEM. All data were analyzed via 2-way ANOVA.

#### **S4. Sexually dimorphic expression of S1PR2 in female SJL cerebella is not**

**controlled by gonadal hormones. A.** Representative images of uterine horns and

upper 1/3 of the vagina of placebo- versus 17 $\beta$ -estradiol(17 $\beta$ E2)-treated, ovariectomized

female SJL mice, and sham-operated, placebo- and 17 $\beta$ E2-treated, ovariectomized

female SJL mice after immunization with PLP peptide (PLP immunization). **B.** Mean

distribution of the uterine weights and upper 1/3 of the vagina in same groups of mice as

in **(A)**. Uterine weights of 17 $\beta$ E2-treated, ovariectomized SJL females with or without

PLP immunization were significantly increased compared with sham and placebo tissues,

as assessed via one-way ANOVA;  $p < 0.0001$ , followed by Bonferroni post-hoc test, for 5

mice per group. **C.** Sham- and placebo-treated, PLP-immunized mice exhibited similar

cumulative body weights while 17 $\beta$ E2-treated, PLP immunized SJL females differ

significantly. One-way ANOVA;  $p < 0.0001$ , followed by Bonferroni post-hoc test, for 5

mice per group. **D.** Mean of cumulative clinical scores for sham-ovariectomized, and

placebo-, and 17 $\beta$ -estradiol-treated, ovariectomized mice after PLP immunization. Note

that 17 $\beta$ -estradiol-treated, ovariectomized mice do not develop EAE. One-way ANOVA  $p$

$< 0.0001$ , followed by Bonferroni post-hoc test, for 5 mice per group. **E.** Protein lysates

derived from CNS regions of sham and ovariectomized naïve SJL female mice and from

those immunized with PLP, with and without 17 $\beta$ -estradiol (17 $\beta$ E2) replacement, were

probed for S1PR2 (red), with  $\beta$ -Tubulin (green) probed as a loading control. Data are

reported as density values of S1PR2 normalized to density values for  $\beta$ -Tubulin. Group

data are normalized to mean values for normal male SJL mice in each CNS region. Data

are mean values of 5 mice per group. Error bars represent  $\pm$  1 SEM. All data were

analyzed via 1-way ANOVA.

**S5. Inhibition of S1PR<sub>2</sub> signaling does not improve EAE progression in male SJL.**

**A.** Clinical score of male SJL immunized with PLP and treated with either vehicle (black) or 1.5 mg/kg JTE-013 (white) when mice reached a score of 2, for 10 consecutive days (gray bar). **B.** Mean of highest severity score and **(c)** mean of cumulative scores of mice in **(A)**. Tx: treatment; error bars  $\pm$  1 S.E.M.

**S6. Pharmacological blockade of S1PR<sub>2</sub> signaling does not enhance retention of**

**body weight during EAE. A-C.** Body weight of SJL immunized with PLP and treated with either vehicle (black) or 1.5 mg/kg JTE-013 (white) when mice reached a score of 2, for either **(A)** females treated 10 or **(B)** 30 consecutive days or **(C)** males treated for 10 consecutive days (gray bar). **D.** Transformed body weight of WT (black) or S1PR<sub>2</sub> <sup>-/-</sup> or wild type mice immunized with MOG. Error bars  $\pm$  1 S.E.M.

**S7. S1PR<sub>2</sub> inactivation ameliorates alterations in BBB permeability. A.**

Immunohistochemical detection of albumen in the CTX, CB and SC of vehicle- (veh) versus JTE0-13-treated female SJL mice with EAE at peak of disease. Images are representative of 3 images each from 4-5 mice/group. **B.** Immunohistochemical detection of albumen in the CTX, CB and SC of wild-type (WT) versus S1PR<sub>2</sub> <sup>-/-</sup> mice. Images are representative of 3 images each from 3-4 mice/group. Scale bars = 50  $\mu$ m.

**S8. S1P dysregulates CNS endothelial barrier structure and function independent of S1PR1, Rac1, clathrin-dependent endocytic, and macropinocytic pathways. A-D.**

Paracellular permeability of *in vitro* BBB cultures was assessed by electrode recording of transendothelial electrical resistance (TEER), reported in ohm/cm<sup>2</sup> **(A)** TEER after treatment of *in vitro* BBB cultures with 1000 nM exogenous S1P for 4h, +/- treatment

with the S1PR1 specific agonist SEW2871 (1000 nM) at 2h **(B-D)** TEER after 1000 nM S1P treatment of BBB cultures pretreated for 2h with **(B)** the clathrin endocytosis inhibitor chlorpromazine (CPMZ, 10ug/ml), **(C)** the macropinocytosis/PI3K inhibitor wortmannin (100nM) or **(D)** Rac1 inhibitor Z62954982 (1000 nM). **E-H**.

Immunocytochemical (ICC) staining of AJs in HCMEC/D3 cells via labeling of VE-cadherin (red, left and middle panels) and confocal z-stack reconstruction of HCMEC/D3 cells (right panels) demonstrating polarized expression of the canonical apical marker gamma-glutamyltransferase-1 (GGT1, green) and basolateral CXCL12 (red) were performed after treatment with vehicle (left panels) or 1000 nM S1P (middle panels) for 4h, both with SEW2871 **(E)**, CPMZ **(F)**, wortmannin **(G)**, or Z62954982 **(H)** treatment at 2h. Inhibitor concentrations in **E-H** are identical to those in **A-D**. TEER values are means of 6-9 replicates taken from 2-3 independent experiments, analyzed via repeated measures two-way ANOVA. ICC images are representative images taken from 2-3 independent experiments. \*p<0.05; \*\*p<0.01; \*\*\*p<0.001.

**S9. SiRNA knockdown confirms pharmacological data showing S1PR2-mediated dysregulation of CNS endothelial barriers *in vitro*.** **A.** Immunocytochemical staining in HCMEC/D3 showing specificity of knockdown for S1PR1 (top) and S1PR2 (bottom) after 2d incubation in normal culture medium, or with 25nM siRNA targeting S1PR1, S1PR2, or a non-targeting control siRNA. Protein levels are assessed by fluorescence intensity, normalized to mean values for untreated cells. **B.** Paracellular permeability of *in vitro* BBB cultures was assessed by electrode recording of transendothelial electrical resistance (TEER), reported in ohm/cm<sup>2</sup>. Cultures were incubated for 2d with 25nM siRNA targeting S1PR1, S1PR2, or a non-targeting control siRNA. After this, cultures were treated with either vehicle or 1000nM S1P for 4h, with TEER measurements every 2h. **C.** Immunocytochemical (ICC) staining of adherens junctions in HCMEC/D3 cells via

labeling of VE-cadherin (red). Cultures were incubated for 2d in normal culture medium, or with 25nM siRNA targeting S1PR1, S1PR2, or a non-targeting control siRNA. After this, cultures were treated with either vehicle or 1000nM S1P for 4h, followed by fixation and immunostaining. Fluorescence intensities are means of 3 replicates, +/- SEM, compared via one-way ANOVA. TEER values are means of 6 replicates taken from 2 independent experiments, analyzed via repeated measures two-way ANOVA. ICC images are representative images of 6 replicates, taken from 2 independent experiments. \*p<0.05; \*\*p<0.01; \*\*\*p<0.001.

**S10. CXCL12 exhibits a sexually dimorphic expression in female SJL in the same CNS regions where S1PR<sub>2</sub> is also dimorphic. A-B.** Spinal cord expression of CXCL12 (red) and CD31 (green) in naïve male and female mice from three different mouse strains, commonly used for EAE: **A.** B10.PL (top row), C57BL/6 (middle row), and SJL (lower row), nuclei stained with ToPro (blue) nuclear stain (IC, isotype control). **B.** Percentage of apicobasal distribution of CXCL12 in relation to CD31 in spinal cord venules. **C.** Supra-spinal expression of CXCL12 (red) and CD31 (green) in naïve male and female SJL, nuclei stained with ToPro (blue) nuclear stain. **D.** Percentage of apicobasal distribution of CXCL12 on supra-spinal CNS regions: A: prelimbic cortex, B: motor cortex, C: retrosplenial cortex, D: hippocampus, E: corpus callosum, F: colliculi, G: = pons, H: cerebellum; white columns: abluminal, black columns: lumenal. Data derived from venules analyzed within 30 images per brain region for 3-5 mice/treatment group and are expressed as the mean percentages of vessels with abluminal (white box), lumenal (black box) or absent (gray box) CXCL12 signal; \*p<0.05; \*\*p<0.01; \*\*\*p<0.001 for chi-squared comparisons between CXCL12 locations within each brain region.

**S11. Distribution of CXCL12 at peak of EAE in SJL is also sexually dimorphic. (a)**

Expression of CXCL12 (red) and CD31 (green) in brainstem (BS), cerebellum (CB) and spinal cord (SC) with ToPro (blue) nuclear staining. IC: isotype control. **(b)** Percentage of

apicobasal distribution of CXCL12 in relation to CD31 in spinal cord venules. Data derived from venules analyzed within 30 images per brain region for 3-5 mice/treatment group and are expressed as the mean percentages of vessels with abluminal (white box), luminal (black box) or absent (gray box) CXCL12 signal; \* $p < 0.05$ ; \*\* $p < 0.01$ ;

\*\*\* $p < 0.001$  for chi-squared comparisons between CXCL12 locations within each brain region.

A

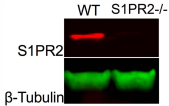

B

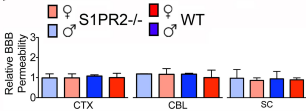

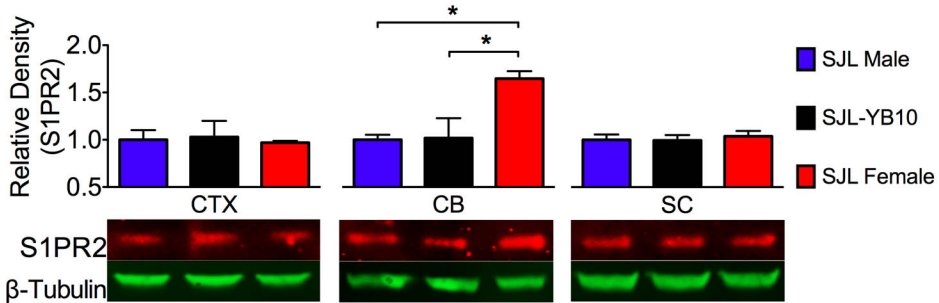

**A**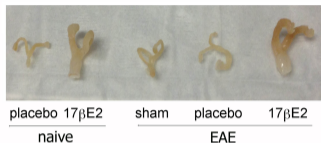**B**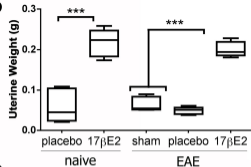**C**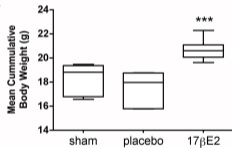**D**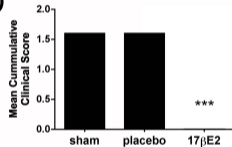**E**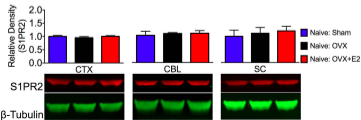**F**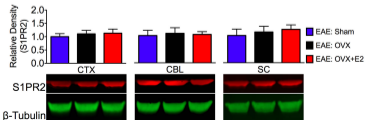

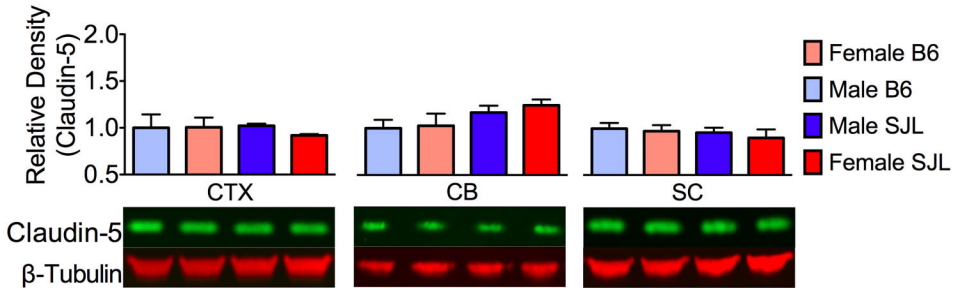

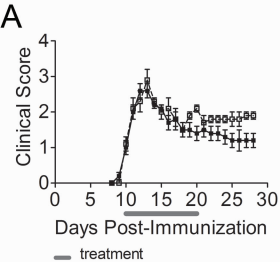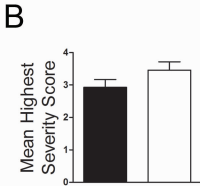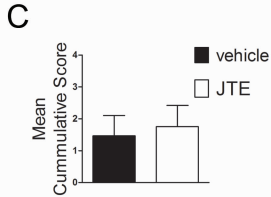

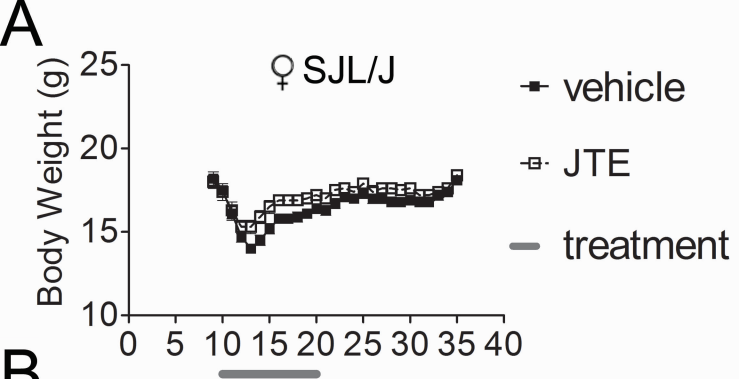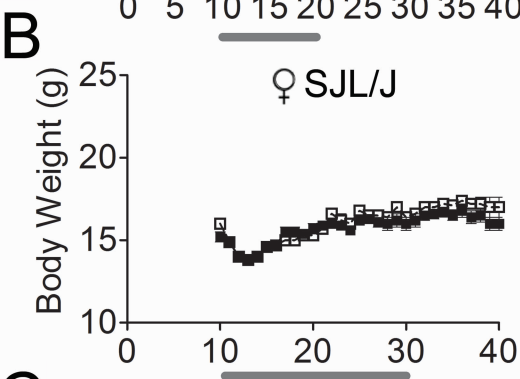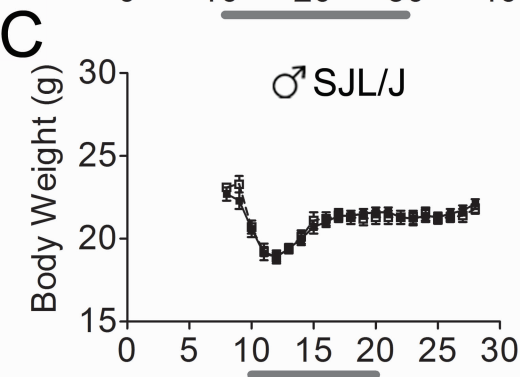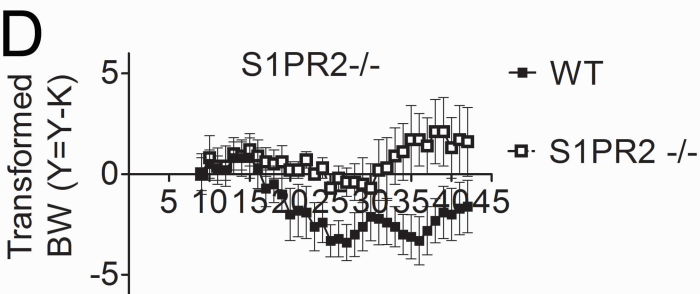

Days Post-Immunization

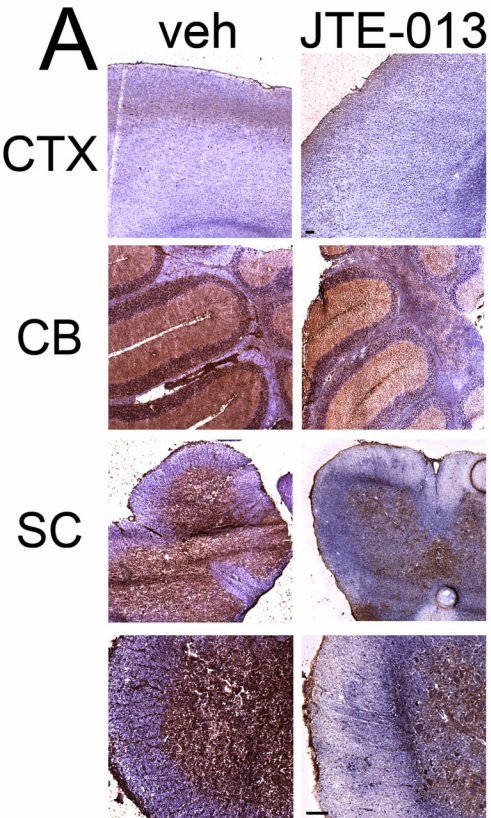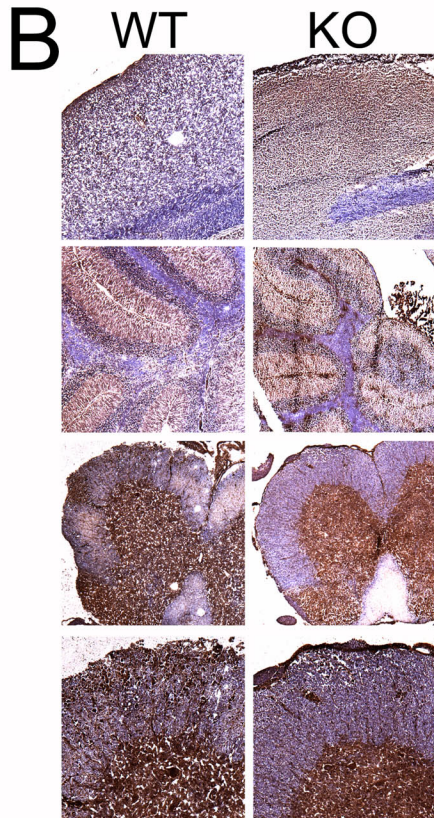

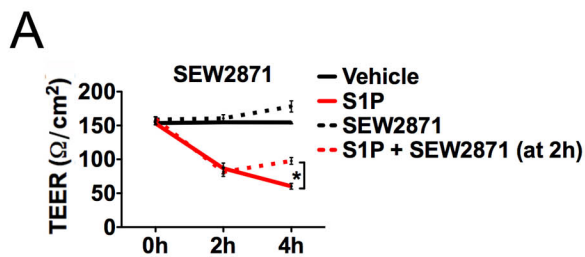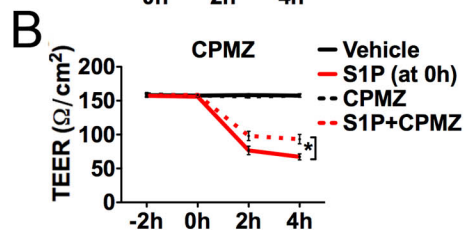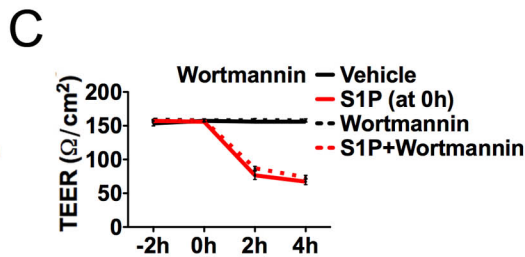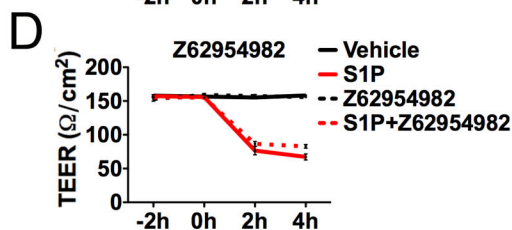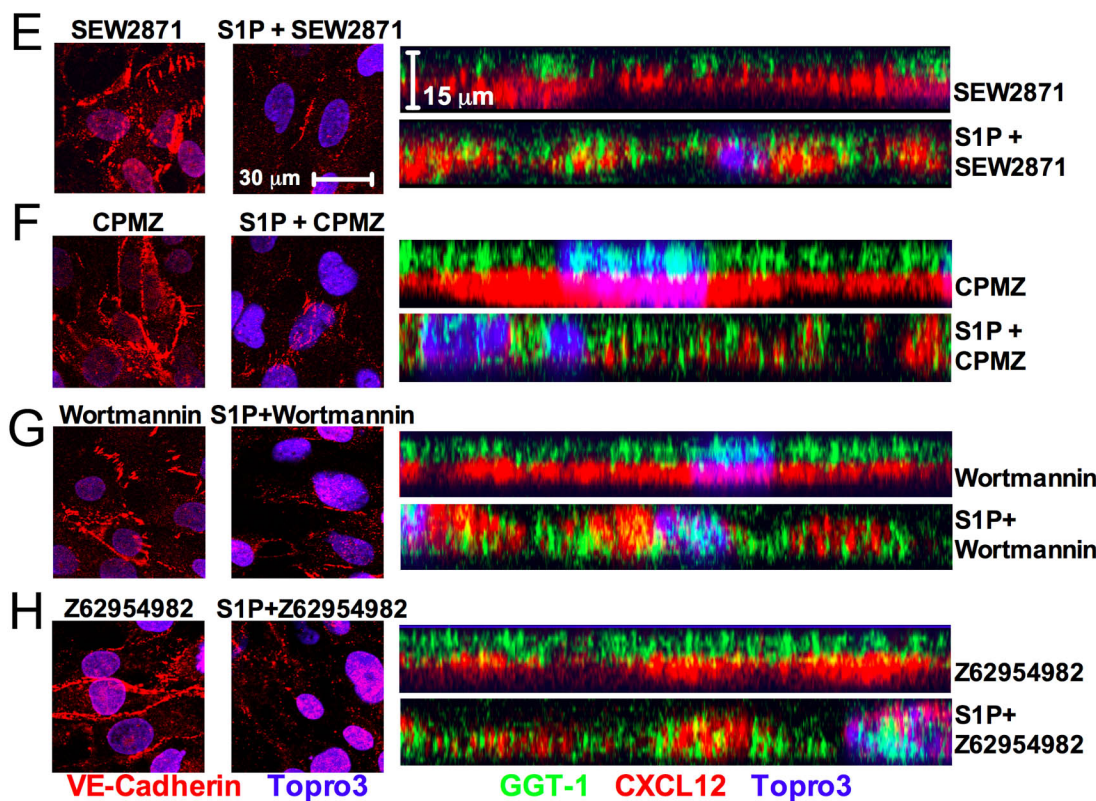

**A**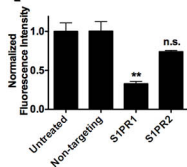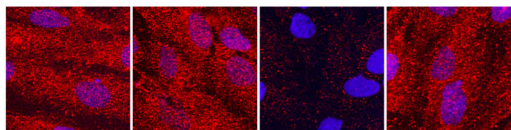**S1PR1 Topro3**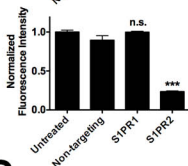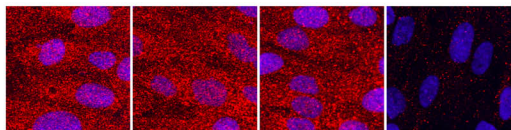**S1PR2 Topro3****B**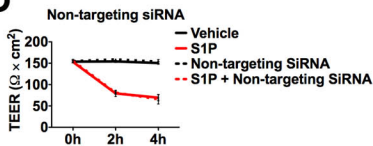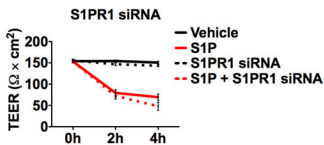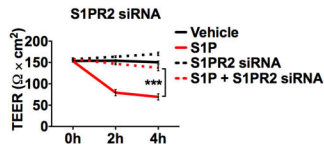**C**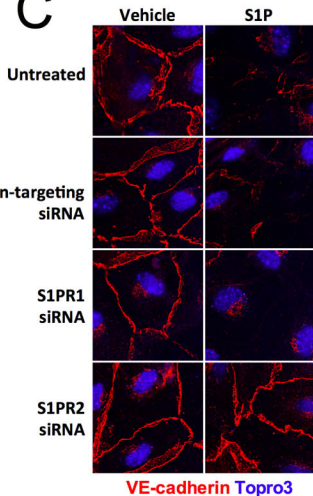

**A**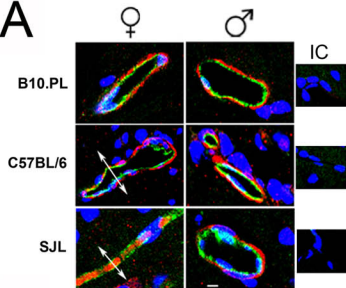**B**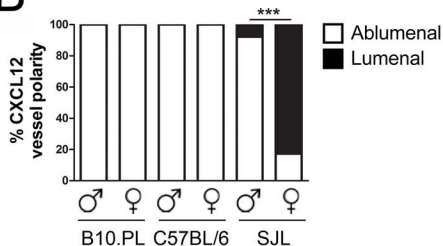**C**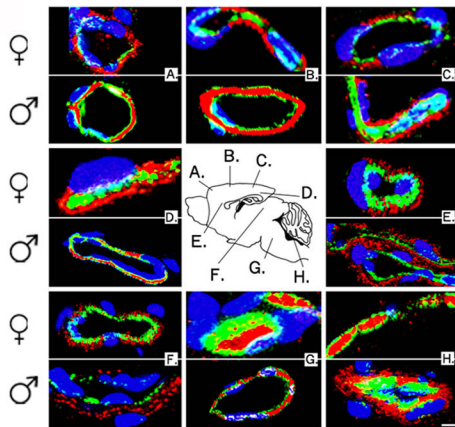**D**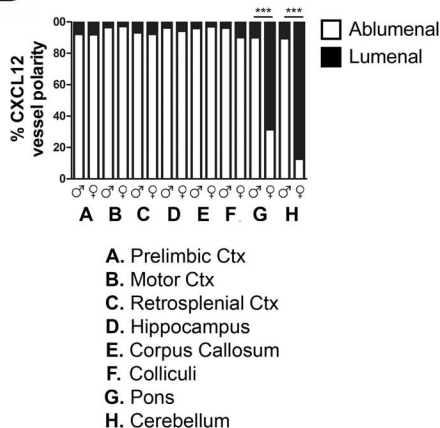

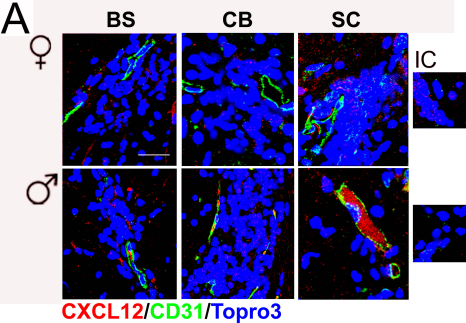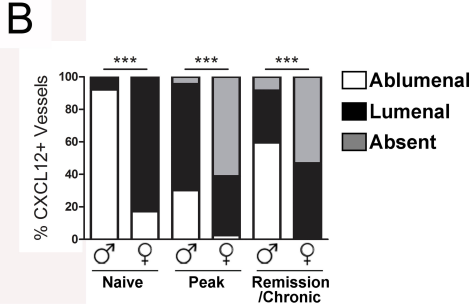

**Supplemental Table 1. Summary of microarray results looking for sexually dimorphic genes among adult SJL cortex and cerebellum.**

|              | microarray hits | unique to | X or Y -linked | autosomal |
|--------------|-----------------|-----------|----------------|-----------|
| <b>CB</b>    | <b>23</b>       | <b>20</b> | <b>15</b>      | <b>5</b>  |
| <b>CTX</b>   | <b>44</b>       | <b>41</b> | <b>5</b>       | <b>36</b> |
| <b>both</b>  | <b>3</b>        |           | <b>3</b>       |           |
| <b>TOTAL</b> | <b>64</b>       | <b>61</b> | <b>23</b>      | <b>41</b> |

|           |                             | Fold-Change<br>(female vs. male) |        |            |                                                                                 |
|-----------|-----------------------------|----------------------------------|--------|------------|---------------------------------------------------------------------------------|
| #         | Gene symbol                 | CB                               | CTX    | Chromosome | Gene ID                                                                         |
|           | <b>Known X or Y -linked</b> |                                  |        |            |                                                                                 |
| <b>1</b>  | Xist                        | 3.837                            | 3.544  | X          | Inactive X specific transcripts                                                 |
|           | Xist                        | 3.829                            | 2.733  | X          | Inactive X specific transcripts                                                 |
|           | Xist                        | 2.970                            | 2.762  | X          | Inactive X specific transcripts                                                 |
|           | Xist                        | 2.070                            | 1.495  | X          | Inactive X specific transcripts                                                 |
| <b>2</b>  | Utx                         | 1.341                            | 1.317  | X          | Lysine (K)-specific demethylase 6A                                              |
| <b>3</b>  | Eif2s3x                     | 1.277                            | 1.348  | X          | Eukaryotic translation initiation factor 2, subunit 3, structural gene X-linked |
| <b>4</b>  | Igsf1                       | 1.101                            | -1.694 | X          | Immunoglobulin superfamily, member 1                                            |
|           | Igsf1                       | 1.043                            | -1.897 | X          | Immunoglobulin superfamily, member 1                                            |
| <b>5</b>  | Timp1                       | -1.215                           | -1.519 | X          | Tissue inhibitor of metalloproteinase 1                                         |
| <b>6</b>  | Pisd-ps3                    | 1.287                            | 1.622  | Y          | Phosphatidylserine decarboxylase, pseudogene 3                                  |
| <b>7</b>  | LOC382297                   | -1.311                           | -1.074 | Y          | similar to RIKEN cDNA 1700029H17                                                |
| <b>8</b>  | LOC100042351                | -1.377                           | -1.087 | Y          | Y-linked testis-specific protein 1-like                                         |
| <b>9</b>  | LOC665746                   | -1.431                           | 1.013  | Y          | Y-linked testis-specific protein 1-like                                         |
| <b>10</b> | LOC382133                   | -1.494                           | 1.002  | Y          | Spermiogenesis specific transcript on the Y 1, family member                    |
| <b>11</b> | LOC665918                   | -1.619                           | -1.115 | Y          | Y-linked testis-specific protein 1-like                                         |

|           |                             |         |        |          |                                                                             |
|-----------|-----------------------------|---------|--------|----------|-----------------------------------------------------------------------------|
| <b>12</b> | LOC100039829                | -1.727  | -1.065 | Y        | Y-linked testis-specific protein 1-like                                     |
| <b>13</b> | LOC435023                   | -1.762  | -1.026 | Y        | similar to Spermiogenesis specific transcript on the Y 2                    |
| <b>14</b> | LOC100039516                | -1.918  | -1.100 | Y        | Y-linked testis-specific protein 1-like                                     |
| <b>15</b> | LOC100042550                | -2.208  | -1.104 | Y        | Y-linked testis-specific protein 1-like                                     |
| <b>16</b> | LOC100041256                | -2.220  | -1.139 | Y        | uncharacterized                                                             |
| <b>17</b> | LOC385575                   | -2.225  | -1.059 | Y        | similar to RIKEN cDNA 1700029H17                                            |
| <b>18</b> | LOC100041934                | -2.420  | -1.122 | Y        | Y-linked testis-specific protein 1-like                                     |
| <b>19</b> | Ddx3y                       | -11.042 | -9.345 | Y        | DEAD (Asp-Glu-Ala-Asp) box polypeptide 3, Y-linked                          |
| <b>20</b> | 4921530F17Rik               | -2.410  | -1.204 | Y-linked | Reinius et al, 2010                                                         |
|           | <b>Novel X or Y -linked</b> |         |        |          |                                                                             |
| <b>21</b> | A830055I09Rik               | -1.203  | 1.524  | X-linked | uncharacterized                                                             |
| <b>22</b> | LOC673556                   | -1.598  | -1.072 | Y-linked | hypothetical LOC673556                                                      |
| <b>23</b> | 4930579N16Rik               | -1.978  | -1.100 | Y-linked | uncharacterized                                                             |
|           | <b>Autosomal</b>            |         |        |          |                                                                             |
| <b>24</b> | Myl1                        | 1.042   | 1.338  | 1        | Myosin, light polypeptide 1                                                 |
| <b>25</b> | Rgs4                        | 1.032   | 1.309  | 1        | Regulator of G-protein signaling 4                                          |
| <b>26</b> | R3hdm1                      | -1.035  | 1.441  | 1        | R3H domain containing 1                                                     |
| <b>27</b> | Ppp1r1c                     | 1.039   | 1.373  | 2        | Protein phosphatase 1, regulatory (inhibitor) subunit 1C                    |
| <b>28</b> | Hdc                         | 1.029   | -1.429 | 2        | Histidine decarboxylase                                                     |
| <b>29</b> | Frmd4a                      | 1.021   | 1.332  | 2        | FERM domain containing 4A                                                   |
| <b>30</b> | Cugbp2                      | -1.039  | 1.453  | 2        | CUGBP, Elav-like family member 2                                            |
| <b>31</b> | Negr1                       | 1.023   | 1.314  | 3        | Neuronal growth regulator 1                                                 |
| <b>32</b> | Lhx8                        | -1.017  | -1.333 | 3        | LIM homeobox protein                                                        |
| <b>33</b> | Hsd3b2                      | -1.037  | 1.400  | 3        | Hydroxy-delta-5-steroid dehydrogenase, 3 beta-and steroid delta-isomerase 2 |
| <b>34</b> | Cort                        | 1.021   | 1.327  | 4        | Cortistatin                                                                 |
| <b>35</b> | Emp1                        | -1.186  | -1.426 | 6        | Epithelial membrane protein 1                                               |

|           |               |        |        |    |                                                               |
|-----------|---------------|--------|--------|----|---------------------------------------------------------------|
| <b>36</b> | Csda [Ybx3]   | -1.564 | -1.166 | 6  | Cold shock domain protein A                                   |
| <b>37</b> | Apoc1         | -1.004 | -1.411 | 7  | Apolipoprotein C-I                                            |
| <b>38</b> | LOC384552     | -1.306 | -1.020 | 7  | similar to OBOX4                                              |
| <b>39</b> | Sorbs2        | 1.075  | 1.347  | 8  | Sorbin and SH3 domain containing 2                            |
| <b>40</b> | Rasd2         | 1.054  | -1.375 | 8  | RASD family, member 2                                         |
| <b>41</b> | Tppp3         | 1.005  | -1.304 | 8  | Tubulin polymerization-promoting protein family member 3      |
| <b>42</b> | Zfhx3         | -1.012 | -1.301 | 8  | Zinc finger homeobox 3                                        |
| <b>43</b> | LOC100046883  | -1.055 | -1.320 | 8  | similar to CKLF-like MARVEL transmembrane domain containing 3 |
| <b>44</b> | Necab2        | -1.076 | -1.325 | 8  | N-terminal EF-hand calcium binding protein 2                  |
| <b>45</b> | Calb2         | -1.090 | -1.636 | 8  | Calbindin 2                                                   |
| <b>46</b> | S1pr2         | 1.311  | -1.092 | 9  | Sphingosine-1-phosphate receptor 2                            |
| <b>47</b> | BC038167      | -1.071 | -1.310 | 9  | Coiled-coil domain containing 153                             |
| <b>48</b> | Anln          | -1.126 | -1.400 | 9  | Anillin, actin binding protein                                |
| <b>49</b> | Il20rb        | -1.367 | 1.006  | 9  | Interleukin 20 receptor beta                                  |
| <b>50</b> | Myl4          | 1.157  | 1.482  | 11 | Myosin, light polypeptide 4                                   |
| <b>51</b> | Foxk2         | 1.016  | 1.415  | 11 | Forkhead box K2                                               |
| <b>52</b> | Slc47a1       | -1.047 | 1.386  | 11 | Solute carrier family 47, member                              |
| <b>53</b> | Doc2b         | -1.057 | -1.312 | 11 | Double C2, beta                                               |
| <b>54</b> | Samd14        | -1.064 | -1.393 | 11 | Sterile alpha motif domain containing 14                      |
| <b>55</b> | A230065H16Rik | 1.025  | -1.517 | 12 | RIKEN cDNA A230065H16 gene                                    |
| <b>56</b> | Tmem90a       | -1.083 | -1.405 | 12 | Transmembrane protein 90a                                     |
| <b>57</b> | Idb2          | -1.168 | 1.377  | 12 | Inhibitor of DNA binding 2                                    |
| <b>58</b> | Nefm          | 1.337  | -1.038 | 14 | Neurofilament, medium polypeptide                             |
| <b>59</b> | Tnnc1         | 1.079  | 1.582  | 14 | Troponin C, cardiac/slow skeletal                             |
| <b>60</b> | Lgals3        | -1.142 | -1.312 | 14 | Lectin, galactose binding, soluble 3                          |
| <b>61</b> | Sdf2l1        | -1.017 | -1.339 | 16 | Stromal cell-derived factor 2-like 1                          |
| <b>62</b> | Adcyap1       | 1.076  | 1.365  | 17 | Adenylate cyclase activating polypeptide 1                    |
| <b>63</b> | 2900055J20Rik | 1.033  | 1.390  | 18 | RIKEN cDNA 2900055J20 gene                                    |
| <b>64</b> | Cd6           | 1.015  | 1.347  | 19 | CD6 antigen                                                   |

| Patient number  | Age (yrs) | Sex    | PMI (hrs) | Diagnosis                                              | CNS level                    | Inflammation | Demyelination | ORO  |
|-----------------|-----------|--------|-----------|--------------------------------------------------------|------------------------------|--------------|---------------|------|
| <b>non-MS</b>   |           |        |           |                                                        |                              |              |               |      |
| 1               | 62        | female | unknown   | post-surgical dehiscence sepsis                        | cerebellum                   | —            | —             | —    |
| 94              | 73        | male   | 3         | CA, CAD, HTN, MI, atypical lower MND*                  | cerebrum                     | —            | —             | —    |
| 210             | 41        | male   | 24        | non-ischemic cardiomyopathy, HTN, small bowel ischemia | cerebellum                   | —            | **            | —    |
| 509             | 71        | female | 7         | pancreatic cancer                                      | cerebrum                     | —            | —             | —    |
| 525             | 81        | male   | 3         | MI                                                     | periventricular white matter | —            | —             | —    |
| 561             | 77        | male   | 6         | CAD***                                                 | cerebellum                   | —            | —             | —    |
| 632             | 56        | female | 18        | emphysema & arteriosclerosis                           | cerebellum                   | —            | —             | —    |
| 908             | 84        | female | 6         | pulmonary embolism                                     | cerebellum                   | —            | —             | —    |
| 938             | 39        | female | 4         | CNS lymphoma                                           | cerebellum                   | —            | —             | —    |
| <b>MS cases</b> |           |        |           |                                                        |                              |              |               |      |
| 58              | 64        | female | 10        | RRMS                                                   | cerebellum                   | —            | †             | —    |
| 71              | 69        | male   | 6         | PPMS                                                   | cerebellum                   | —            | —             | —    |
| 101             | 46        | female | 6         | SPMS                                                   | cerebellum                   | —            | —             | —    |
| 107             | 88        | male   | 6         | PRMS                                                   | cerebellum                   | —            | —             | —    |
| 234             | 95        | female | 8         | SPMS                                                   | cerebellum                   | —            | —             | —    |
| 271             | 50        | female | 20        | SPMS                                                   | cerebellum                   | —            | ††††          | —    |
| 303             | 45        | female | 3         | PPMS                                                   | cerebellum                   | ††††         | †             | †††† |
| 305             | 70        | male   | 8         | SPMS                                                   | cerebellum                   | —            | —             | —    |
| 388             | 69        | female | 9         | RRMS                                                   | cerebellum                   | —            | —             | —    |
| 650             | 35        | male   | 10        | PPMS                                                   | cerebellum                   | †            | †             | ††   |
| 1101            | 54        | male   | 7         | SPMS                                                   | cerebellum                   | —            | —             | —    |

PMI: post-mortem interval, PPMS: primary progressive MS, PRMS: progressive-relapsing MS, RRMS: relapsing-remitting MS, SPMS: secondary progressive MS, CA: cardiac arrest, CAD: coronary artery disease, HTN: hypertension, MI: myocardial infarction, MND: motor neuron disease, \*Patient received intravenous immunoglobulin treatment. \*\*Biopsy showed a slightly pale site, presumably an artifact as assessed by its location and shape. \*\*\*Biopsy showed some features similar to Alzheimer's but patient has no clinical history of AD.
